# Supplementary figures and images for: Phase I Dose-Escalation Trial of MIW815 (ADU-S100), an Intratumoral STING Agonist, in Patients with Advanced/Metastatic Solid Tumors or Lymphomas
Source: Oxford University Press journal article supplement (doi:10.1158/1078-0432.ccr-21-1963), 2021-10-28

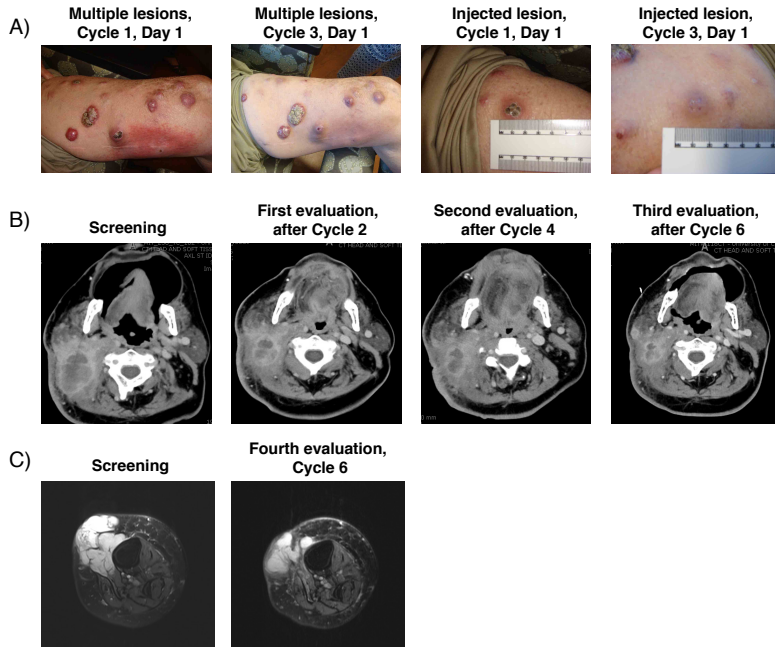

Supplement: ccr-21-1963_supps2.pdf [file ccr-21-1963_supps2.pdf]
